# Supplementary material for: A framework for the assessment of the spatial and temporal patterns of threatened coastal delphinids
Source: PubMed Central journal article supplement (PMC4726438; doi:10.1038/srep19883), 2016-01-25
Supplement: srep19883-s1.pdf [file srep19883-s1.pdf]

# **A framework for the assessment of the spatial and temporal patterns of threatened coastal delphinids**

Wang Jingzhen<sup>1,2</sup>, Yang Yingting<sup>1</sup>, Yang Feng<sup>1</sup>, Li Yuelin<sup>1</sup>, Li Lianjie<sup>1</sup>, Lin Derun<sup>1</sup>,  
He Tangtian<sup>3</sup>, Liang Bo<sup>4</sup>, Zhang Tao<sup>1</sup>, Lin Yao<sup>1</sup>, Li Ping<sup>1</sup>, Liu Wenhua<sup>1\*</sup>

1 Marine Biology Institute, Shantou University, Guangdong 515063, China

2 College of Ocean, Qinzhou University, Guangxi 535000, China

3 Department of Biology and Chemistry, City University of Hong Kong

4 The Chinese University of Hong Kong

\*To whom correspondence should be addressed:

Wenhua Liu, Ph.D., Shantou University, Shantou, Guangdong 515063, P. R. China.

Fax: +86-754-86500614; E-mail: whliu@stu.edu.cn

## **Contents**

**Eastern Guangdong Fishermen Survey Questionnaire (Chinese white dolphin and other cetaceans);**

## Eastern Guangdong Fishermen Survey Questionnaire

### (Chinese white dolphin and other cetaceans)

Location: \_\_\_\_\_ Serial No.: \_\_\_\_\_ Interviewer: \_\_\_\_\_ Time: \_\_\_\_\_

Information of the informant: Gender: \_\_\_\_\_ Age: \_\_\_\_\_ Status: \_\_\_\_\_ Retired (Y/N): \_\_\_\_\_

Information of the vessels of the informant: Horsepower: \_\_\_\_\_ Length: \_\_\_\_\_

\*\*Informant is asked to identify a Chinese white dolphin (CWD) or the other cetacean from a series of photographs without being prompted. If he/she is able to do this, the following questions are asked.

1, How many years have you been fishing?

2, Which area do you usually go fishing?

3, Do you know what a CWD is? (Y/N)

Have you ever seen a CWD in your lifetime? (Y/N)

What do you call it? Local name: \_\_\_\_\_

4, When and where is the last time you saw a CWD group and how many CWD did you see?

Time: \_\_\_\_\_ Location: \_\_\_\_\_ Number of individuals: \_\_\_\_\_

5, Can you recall some sighting cases of CWD and other cetaceans in the past few years (time and location)? Can you describe what you had seen? (population number and individual characteristics)

| Cetaceans | Location | Particular Time (M/Y or seasons/Y) | Population number | Characteristic description |
|-----------|----------|------------------------------------|-------------------|----------------------------|
| 1 CWD     |          |                                    |                   |                            |
|           |          |                                    |                   |                            |
|           |          |                                    |                   |                            |
|           |          |                                    |                   |                            |
|           |          |                                    |                   |                            |

Note: Characteristic description: e.g. length, color or pattern, with or without fin and snout, long or short snout, extended forehead, with or without spout.



8, Have the rivers nearby gone through any large changes in the past few years (runoff volume changes etc.)? (Y/N) Can you supply some details of the changes? (river name, what changes, changed time, potential causes)

| River name | Changes | Changed time | Causes |
|------------|---------|--------------|--------|
|            |         |              |        |
|            |         |              |        |

9, Can you remember any cases of CWD stranding or death? (Y/N)

Describe any related events that were seen (location, date, other details)

| Time (M/Y, Season/Y) | Location | Cetacean species | Handling way | Other details |
|----------------------|----------|------------------|--------------|---------------|
|                      |          | CWD              |              |               |
|                      |          |                  |              |               |

10, Do you know any events of accidentally capture of cetacean? What kind of fishing gear?

When and where did this happened? How did the people deal with these cetaceans.

| Cetacean      | Fishing gears                                                                                                        | Season or month | Location | Dead or alive |  |
|---------------|----------------------------------------------------------------------------------------------------------------------|-----------------|----------|---------------|--|
| 1 CWD         |                                                                                                                      |                 |          |               |  |
|               |                                                                                                                      |                 |          |               |  |
| Fishing gears | A Gill net B Stake-net C Drag nets D Rolling hooks E Electro-fishing<br>F Other type of fishing gear (describe)_____ |                 |          |               |  |

11, Do you know whom to contact when encountering a stranded dolphin? (Y/N)

Contacts: \_\_\_\_\_

12, Do you know that CWD is the first-class state protected animal? (Y/N)

Has the local government promoted on this (e.g. propaganda or education work)? (Y/N)

How is CWD related to your life?

Does it have any specific meanings in your culture?
